# Supplementary material for: Independent RNA polymerase II preinitiation complex dynamics and nucleosome turnover at promoter sites in vivo
Source: HighWire-hosted journal article supplement (doi:10.1101/gr.157792.113), 2013-12-02
Supplement: Supplemental_Methods.docx [file Supplemental_Methods.docx]

**Independent RNA Polymerase II Preinitiation Complex Dynamics**

**and Nucleosome Turnover at Promoter Sites In Vivo**

Yoselin Grimaldi, Paolo Ferrari and Michel Strubin

**Supplemental Methods**

**Supplemental Methods**

***Yeast Strains***

The strain used in Figure 3 contains a temperature-sensitive *spt6* allele (*spt6-14*; Bortvin and Winston 1996) in a TBP-anchor-away background and was constructed as follows. Because we failed to introduce the *spt6-14* allele into the original strain, the *tor1-1* mutant allele (S1972R) was replaced by the wild-type *TOR1* allele (a suggestion of Robbie Loewith, University of Geneva). For this, the *URA3* marker used to disrupt *BAR1* was recovered by excision with Cre recombinase expressed from pSH47 (Euroscarf No P30119). Cells were then transformed with a PCR fragment amplified from YCplac33::Tor1 that contains the relevant wild-type *TOR1* sequence (kindly provided by Robbie Loewith) together with a *URA3*-marked vector expressing wild-type TBP (to avoid a rapamycin-sensitive phenotype due to nuclear depletion of FRB-tagged TBP). The desired strain was obtained by selection for uracil prototrophy and rapamycin sensitivity. After loss of the TBP plasmid, the *spt6-14* allele amplified by PCR from strain FY957 (a gift from Fred Winston, Harvard Medical School) and cloned into pRS306 was used to replace the wild-type *SPT6* allele by two-step gene replacement.

The anchor-away strain in Supplemental Figure S6 expressing native TBP and FRB-tagged Spt6 was constructed from *Mat***a** strain HHY221 deleted for *BAR1*. The FRB-KanMX6 cassette was amplified by PCR from plasmid pFA6a-FRB-KanMX6 (Haruki et al. 2008) using primers containing sequences flanking the *SPT6* locus. The PCR fragment was integrated at the C terminus of the chromosomal *SPT6* open reading frame by one-step homologous recombination. Details of the plasmid constructions and strains are available upon request.

***Chromatin Immunoprecipitation (ChIP) and Quantitative PCR***

A detailed protocol for ChIP and quantitative PCR analysis can be found at <http://www.mimo.unige.ch/STRUBIN_LABb.htm>. Briefly, whole-cell extracts equivalent to about 2x108 yeast cells were immunoprecipitated with anti-HA antibodies (2 μl, clone 16B12, Covance), anti-TBP antibodies (2 μl, Laurie Stargell), anti-Rpb1 (RNA Pol II) antibodies (7 μl, clone 8WG16, Covance) or antibodies to core histone H3 (1 μl, ab1791, Abcam). The recovered DNA and at least two standard dilutions of the input DNA were quantified in duplicate by real-time PCR using the KAPA SYBR FAST qPCR Kit Master Mix (2X) Universal (Kapa Biosystems) and the Biorad CFX96 Real-time PCR System. Analysis of the *35S* promoter was with samples diluted 100-fold to account for gene copy number. Sequences of the oligonucleotide primers are available upon request. The immunoprecipitation (IP) value for a given region was calculated as the ratio between the IP signal and the respective input DNA signal to correct for variation between different samples and primer pairs. The normalized (to input) IP values are expressed as % of input or relative to the normalized value at a reference region and/or time point, which was set to 100 as indicated in the Figure Legend. In Figure 3C, the normalized IP values for histone H3 were divided by those obtained at the same time point at a subtelomeric region on chromosome VI.

***Plasmid Sequences***

The sequences of the constructs used in this work are listed below. The native TBP competitor expressed from the *GAL1* promoter was cloned into the *TRP1* marked multicopy plasmid YEplac112 (available on <http://www.addgene.org/vector-database/4892/>). All other constructs were cloned into the pRS plasmid series (available on <https://www.addgene.org/>). Construction of the constitutively active *DED1* promoter has been previously described ([Hope and Struhl 1986](#_ENREF_1)). Shown in bold underlined type are the restriction sites used for cloning into the vector.

***HA-tagged TBP allele***

**CTGCAG**AGCATCCTCGGGGATTGGGAACCTCTCATTTAGCAAGTAATTCACATAACACAGATTTAGAAACCATTTCCATTGTGACTTTTCCCGACATTGCGAGAGTAGCCCATGAAAACTCGTCTTCACCCTGCGGTGCTGTTTCAGCTTAATGCAAAGCATCACGCCGACATACTGGAATACGGATGCCCAATTTTGATACAACTCATCCTGCAAATTTACCATGTACTGGACTAATTCATTGCAATTTCTTAGTGCAATCTTATAGTGGAACTTACTGTCTCTCATAAGTGGCAAGTCATGTAACAGCAGAAACTCGCAACGCATGATCTCTTCTACCAAATCTGTGTCGCTCTGGTGCGTTTGTAACCGTTCTTTCAAACTGGAAATGTAAAGCTCTGCTAGGTCAAAATTATACGTCTCCTGTATCAATAACTCCACCATCTCAAACGTGACCTTACTATCCTCCAGAACTGAAAGCGTACATTTCGTTTTCAATAGCTGAAACATCTGGATAGACATGTTCATGAGGCCATAATACTGCTTCAACCCTTCCTCAGAACCGATTTTATTCGCAATTGAATATGCATGGTCTCTGTATTCCTGTGCTAAGTGGTATACTTGTGAAATACTAAGTTTGTCGCCAAGATTTTCCATGAATTTGTACTTCTTTCGAAATCGTTCAATTTCTACCAATACTGATTCCCCTCTGATAGCTGAGATGTCGGGATTCCCTTTGCTGATAGATCTAACTCATCTCTTTACGTATTTTAATTGTGAAGCCGTAAATAGTTATCTTCCAAGTTTCTCTTACGCGAGCTTTTTGGGAAAAGAAAAAAATTTGAAGATCTACATATAAAACATGGCTTCAAAGGATTACTAATGACTTTTTTTACCTTGATAGGTATTCTTGATGGTAAGAGTAAACAAGGGACGTGAAAATTACAGTAGTTACTGTTTTTTTTGGACTATAAGATCGGGGGAAAGATAACACATAAGAAATAAAACGACtACTAGTTAGACTGCTCTGCGGAAGAAGCAAGGAAGTAAAGGCTGCATTTTATTTTTCTTTTCTAGTCCAACATAAACAGGTATATCAAGAGAAACTTTTTTGAATTCACCATGGTCGACGGCTACCCATACGATGTTCCAGATTACGCTGGATATCCCTATGACGTGCCCGACTATGCCGGTTACCCGTACGATGTCCCGGACTACGCCGGGCCGCGGCATATGGCCGATGAGGAACGTTTAAAGGAGTTTAAAGAGGCAAACAAGATAGTGTTTGATCCAAATACCAGACAAGTATGGGAAAACCAGAATCGAGATGGTACAAAACCAGCAACTACTTTCCAGAGTGAAGAGGACATAAAAAGAGCTGCCCCAGAATCTGAAAAAGACACCTCCGCCACATCAGGTATTGTTCCAACACTACAAAACATTGTGGCAACTGTGACTTTGGGGTGCAGGTTAGATCTGAAAACAGTTGCGCTACATGCCCGTAATGCAGAATATAACCCCAAGCGTTTTGCTGCTGTCATCATGCGTATTAGAGAGCCAAAAACTACAGCTTTAATTTTTGCCTCAGGGAAAATGGTTGTTACCGGTGCAAAAAGTGAGGATGACTCAAAGCTGGCCAGTAGAAAATATGCAAGAATTATCCAAAAAATCGGGTTTGCTGCTAAATTCACAGACTTCAAAATACAAAATATTGTCGGTTCGTGTGACGTTAAATTCCCTATACGTCTAGAAGGGTTAGCATTCAGTCATGGTACTTTCTCCTCCTATGAGCCAGAATTGTTTCCTGGTTTGATCTATAGAATGGTGAAGCCGAAAATTGTGTTGTTAATTTTTGTTTCAGGAAAGATTGTTCTTACTGGTGCAAAGCAAAGGGAAGAAATTTACCAAGCTTTTGAAGCTATATACCCTGTGCTAAGTGAATTTAGAAAAATGTGATGGGGAAGGAGTAGACGAAAAGAAAAAAAGGTTTTCTATTTGTTCCATTTTCTCAATTATTAATGGTCCTCAAAGAAATAAAAGAAAAGGAAGAAGAAGTAATTGTAATATCAAACGGTTTTTTATAGTATATTCTTCTTATTCTATATTTATATATCAATGTTTTATAATAAGATGTTTATTCATAGCATATCTGGTGGATCGTCTCTATTAAGCGCCAGCGAGGTGTTTGCCTCTGCATTTTTCAGCAAAGCAAGCTCCCTTTCCAGCTTGAATCTATGTTCACGCTCATCCGACAATTCTTTTTCATACTTTCTTTGTGTACTCGTAAGCACTTTTTTAAACTCACTTGTCATTATTGAAAGTGAACGTGATCCAGAACCGCTTGTGGGGCTTCCTACAGAGGAAGGTGAACTT**GGATCC**

***Constitutively expressed TBP competitor***

**GGTACC**AACGATGTTCCCTCCACCAAAGGTGTTCTTATGTAGTGACACCGATTATTTAAAGCTGCAGCATACGATATATATACATGTGTATATATGTATACCTATGAATGTCAGTAAGTATGTATACGAACAGTATGATACTGAAGATGACAAGGTAATGCATCATTCTATACGTGTCATTCTGAACGAGGCGCGCTTTCCTTTTTTCTTTTTGCTTTTTCTTTTTTTTTCTCTTGAACTCGAGAAAAAAAATATAAAAGAGACGGCTACAATTAATACATAACCTTATGTATCATACACATACGATTTAGGTGACACTATAGAATACAAGCTTGATATCGAATTCATGGCCGATGAGGAACGTTTAAAGGAGTTTAAAGAGGCAAACAAGATAGTGTTTGATCCAAATACCAGACAAGTATGGGAAAACCAGAATCGAGATGGTACAAAACCAGCAACTACTTTCCAGAGTGAAGAGGACATAAAAAGAGCTGCCCCAGAATCTGAAAAAGACACCTCCGCCACATCAGGTATTGTTCCAACACTACAAAACATTGTGGCAACTGTGACTTTGGGGTGCAGGTTAGATCTGAAAACAGTTGCGCTACATGCCCGTAATGCAGAATATAACCCCAAGCGTTTTGCTGCTGTCATCATGCGTATTAGAGAGCCAAAAACTACAGCTTTAATTTTTGCCTCAGGGAAAATGGTTGTTACCGGTGCAAAAAGTGAGGATGACTCAAAGCTGGCCAGTAGAAAATATGCAAGAATTATCCAAAAAATCGGGTTTGCTGCTAAATTCACAGACTTCAAAATACAAAATATTGTCGGTTCGTGTGACGTTAAATTCCCTATACGTCTAGAAGGGTTAGCATTCAGTCATGGTACTTTCTCCTCCTATGAGCCAGAATTGTTTCCTGGTTTGATCTATAGAATGGTGAAGCCGAAAATTGTGTTGTTAATTTTTGTTTCAGGAAAGATTGTTCTTACTGGTGCAAAGCAAAGGGAAGAAATTTACCAAGCTTTTGAAGCTATATACCCTGTGCTAAGTGAATTTAGAAAAATGTGATGGGGAAGGAGTAGACGAAAAGAAAAAAAGGTTTTCTATTTGTTCCATTTTCTCAATTATTAATGGTCCTCAAAGAAATAAAAGAAAAGGAAGAAGAAGTAATTGTAATATCAAACGGTTTTTTATAGTATATTCTTCTTATTCTATATTTATATATCAATGTTTTATAATAAGATGTTTATTCATAGCATATCTGGTGGATCGTCTCTATTAAGCGCCAGCGAGGTGTTTGCCTCTGCATTTTTCAGCAAAGCAAGCTCCCTTTCCAGCTTGAATCTATGTTCACGCTCATCCGACAATTCTTTTTCATACTTTCTTTGTGTACTCGTAAGCACTTTTTTAAACTCACTTGTCATTATTGAAAGTGAACGTGATCCAGAACCGCTTGTGGGGCTTCCTACAGAGGAAGGTGAACTT**GGATCC**

***Galactose inducible TBP competitor***

**CTGCAG**AGCATCCTCGGGGATTGGGAACCTCTCATTTAGCAAGTAATTCACATAACACAGATTTAGAAACCATTTCCATTGTGACTTTTCCCGACATTGCGAGAGTAGCCCATGAAAACTCGTCTTCACCCTGCGGTGCTGTTTCAGCTTAATGCAAAGCATCACGCCGACATACTGGAATACGGATGCCCAATTTTGATACAACTCATCCTGCAAATTTACCATGTACTGGACTAATTCATTGCAATTTCTTAGTGCAATCTTATAGTGGAACTTACTGTCTCTCATAAGTGGCAAGTCATGTAACAGCAGAAACTCGCAACGCATGATCTCTTCTACCAAATCTGTGTCGCTCTGGTGCGTTTGTAACCGTTCTTTCAAACTGGAAATGTAAAGCTCTGCTAGGTCAAAATTATACGTCTCCTGTATCAATAACTCCACCATCTCAAACGTGACCTTACTATCCTCCAGAACTGAAAGCGTACATTTCGTTTTCAATAGCTGAAACATCTGGATAGACATGTTCATGAGGCCATAATACTGCTTCAACCCTTCCTCAGAACCGATTTTATTCGCAATTGAATATGCATGGTCTCTGTATTCCTGTGCTAAGTGGTATACTTGTGAAATACTAAGTTTGTCGCCAAGATTTTCCATGAATTTGTACTTCTTTCGAAATCGTTCAATTTCTACCAATACTGATTCCCCTCTGATAGCTGAGATGTCGGGATTCCCTTTGCTGATAGATCTAACTCATCTCTTTACGTATTTTAATTGTGAAGCCGTAAATAGTTATCTTCCAAGTTTCTCTTACGCGAGCTTTTTGGGAAAAGAAAAAAATTTGAAGATCTACATATAAAACATGGCTTCAAAGGATTACTAATGACTTTTTTTACCTTGATAGGTATTCTTGATGGTAAGAGTAAACAAGGGACGTGAAAATTACAGTAGTTACTGTTTTTTTTGGACTATAAGATCGGGGGAAAGATAACACATAAGAAATAAAACGACTACTAGTTAGACTGCTCTGCGGAAGAAGCAAGGAAGTAAAGGCTGCATTTTATTTTTCTTTTCTAGTCCAACATAAACAGGTATATCAAGAGAAACTTTTTTGAATTCGAGCTCGGTACCCTGAGCTGTCATTTATATTGAATTTTCAAAAATTCTTACTTTTTTTTTGGATGGACGCAAAGAAGTTTAATAATCATATTACATGGCATTACCACCATATACATATCCATATACATATCCATATCTAATCTTACTTATATGTTGTGGAAATGTAAAGAGCCCCATTATCTTAGCCTAAAAAAACCTTCTCTTTGGAACTTTCAGTAATACGCTTAACTGCTCATTGCTATATTGAAGTACGGATTAGAAGCCGCCGAGCGGGTGACAGCCCTCCGAAGGAAGACTCTCCTCCGTGCGTCCTCGTCTTCACCGGTCGCGTTCCTGAAACGCAGATGTGCCTCGCGCCGCACTGCTCCGAACAATAAAGATTCTACAATACTAGCTTTTATGGTTATGAAGAGGAAAAATTGGCAGTAACCTGGCCCCACAAACCTTCAAATGAACGAATCAAATTAACAACCATAGGATGATAATGCGATTAGTTTTTTAGCCTTATTTCTGGGGTAATTAATCAGCGAAGCGATGATTTTTGATCTATTAACAGATATATAAATGCAAAAACTGCATAACCACTTTAACTAATACTTTCAACATTTTCGGTTTGTATTACTTCTTATTCAAATGTAATAAAAGTATCAACAAAAAATTGTTAATATACCTCTATACTTTAACGTCAAGGAGAAAAAACCCCGGATCCTCTAGTTAGACTGCTCTGCGGAAGAAGCAAGGAAGTAAAGGCTGCATTTTATTTTTCTTTTCTAGTCCAACATAAACAGGTGTATCAAGAGAAACTTTTTTAATTATGGCCGATGAGGAACGTTTAAAGGAGTTTAAAGAGGCAAACAAGATAGTGTTTGATCCAAATACCAGACAAGTATGGGAAAACCAGAATCGAGATGGTACAAAACCAGCAACTACTTTCCAGAGTGAAGAGGACATAAAAAGAGCTGCCCCAGAATCTGAAAAAGACACCTCCGCCACATCAGGTATTGTTCCAACACTACAAAACATTGTGGCAACTGTGACTTTGGGGTGCAGGTTAGATCTGAAAACAGTTGCGCTACATGCCCGTAATGCAGAATATAACCCCAAGCGTTTTGCTGCTGTCATCATGCGTATTAGAGAGCCAAAAACTACAGCTTTAATTTTTGCCTCAGGGAAAATGGTTGTTACCGGTGCAAAAAGTGAGGATGACTCAAAGCTGGCCAGTAGAAAATATGCAAGAATTATCCAAAAAATCGGGTTTGCTGCTAAATTCACAGACTTCAAAATACAAAATATTGTCGGTTCGTGTGACGTTAAATTCCCTATACGTCTAGAAGGGTTAGCATTCAGTCATGGTACTTTCTCCTCCTATGAGCCAGAATTGTTTCCTGGTTTGATCTATAGAATGGTGAAGCCGAAAATTGTGTTGTTAATTTTTGTTTCAGGAAAGATTGTTCTTACTGGTGCAAAGCAAAGGGAAGAAATTTACCAAGCTTTTGAAGCTATATACCCTGTGCTAAGTGAATTTAGAAAAATGTGATGGGGAAGGAGTAGACGAAAAGAAAAAAAGGTTTTCTATTTGTTCCATTTTCTCAATTATTAATGGTCCTCAAAGAAATAAAAGAAAAGGAAGAAGAAGTAATTGTAATATCAAACGGTTTTTTATAGTATATTCTTCTTATTCTATATTTATATATCAATGTTTTATAATAAGATGTTTATTCATAGCATATCTGGTGGATCGTCTCTATTAAGCGCCAGCGAGGTGTTTGCCTCTGCATTTTTCAGCAAAGCAAGCTCCCTTTCCAGCTTGAATCTATGTTCACGCTCATCCGACAATTCTTTTTCATACTTTCTTTGTGTACTCGTAAGCACTTTTTTAAACTCACTTGTCATTATTGAAAGTGAACGTGATCCAGAACCGCTTGTGGGGCTTCCTACAGAGGAAGGTGAACTT**GGATCC**

***Galactose inducible HA-tagged version of histone H3***

**GGTACC**GATCAAAAATCATCGCTTCGCTGATTAATTACCCCAGAAATAAGGCTAAAAAACTAATCGCATTATCATCCTATGGTTGTTAATTTGATTCGTTCATTTGAAGGTTTGTGGGGCCAGGTTACTGCCAATTTTTCCTCTTCATAACCATAAAAGCTAGTATTGTAGAATCTTTATTGTTCGGAGCAGTGCGGCGCGAGGCACATCTGCGTTTCAGGAACGCGACCGGTGAAGACGAGGACGCACGGAGGAGAGTCTTCCTTCGGAGGGCTGTCACCCGCTCGGCGGCTTCTAATCCGTACTTCAATATAGCAATGAGCAGTTAAGCGTATTACTGAAAGTTCCAAAGAGAAGGTTTTTTTAGGCTAATCGACCTCGAGCAGATCCGCCAGGCGTGTATATAGCGTGGATGGCCAGGCAACTTTAGTGCTGACACATACAGGCATATATATATGTGTGCGACGACACATGATCATATGGCATGCATGTGCTCTGTATGTATATAAAACTCTTGTTTTCTTCTTTTCTCTAAATATTCTTTCCTTATACATTAGGTCCTTTGTAGCATAAATTACTATACTTCTATAGACACGCAAACACAAATACACACACTAAATTACATGGCCAGAACAAAGCAAACAGCAAGAAAGTCCACTGGTGGTAAGGCCCCAAGAAAGCAATTAGCTTCTAAGGCTGCCAGAAAATCCGCCCCATCTACCGGTGGTGTTAAGAAGCCTCACAGATATAAGCCAGGTACTGTTGCTTTGAGAGAAATCAGAAGATTCCAAAAATCTACTGAACTGTTGATCAGAAAGTTGCCTTTCCAAAGATTGGTCAGAGAAATCGCTCAAGATTTCAAGACCGACTTGAGATTTCAATCTTCTGCCATCGGTGCCTTGCAAGAATCTGTCGAAGCCTACTTAGTCTCTTTATTTGAAGATACCAACTTGGCTGCCATTCACGCCAAGCGTGTCACTATCCAAAAGAAGGATATCAAGTTGGCTAGAAGATTAAGAGGTGAAAGATCAGAATTCGTCGACGGCTACCCATACGATGTTCCAGATTACGCTGGATATCCCTATGACGTGCCCGACTATGCCGGTTACCCGTACGATGTCCCGGACTACGCCGGGCCGCGGCATATGTGAGCATGCAAGCTAGCCCGCCTGTGTTATCGCTTAATTTTTGACGACAACCAAGAGGTCAAATCAATATCTACCCTTTCATTTATTACGTGTTGCTGGCAAACTAATTTATTCCAATTCTCTCATCATTAGCTCACCCTTTCCATACTTTTTCATACTTTTATACATATGTATTTGTAGTTATCACTTTAACAGATTTTTTCATGTTTTTCTTTTCTGATACGCCTTTCCCTCCGCAGGAAATGAAAGATGAACCACCCATTACATTCGATTTTTTTTTTAATTATATTTTTGACTATTATTTAATCATTAAAAACACATATATTTCATAAATTCGTAAGGTCGTTAGTTCTATCGTAAAAGTGAAAAAGTTTTGAGCCAGTTTTCAAAAACCCGCAGGATCCCACTATGTATGGCTTTAAATAATGGTTTTTCACGTGCATCAAGTCCGTACTATCTTCACCACTATAAACTCTTATAGGTGGATTATTCGTTTCGAATGCTGGTGGCAGTGCCGGTTTGAAAATAATCTTACCTACCCATGGGTGGTCTTCCGTTAACGGTTTGATGCATCTTAATGAGTCTTTGATATATCTTTTCCTTGAAACTAGTTGTGTCGCCGGTGCCCACTTC**GAGCTC**

**References**

Bortvin A, Winston F. 1996. Evidence that Spt6p controls chromatin structure by a direct interaction with histones. *Science* **272**: 1473-1476.

Haruki H, Nishikawa J, Laemmli UK. 2008. The anchor-away technique: rapid, conditional establishment of yeast mutant phenotypes. *Mol Cell* **31**: 925-932.

Hope IA, Struhl K. 1986. Functional dissection of a eukaryotic transcriptional activator protein, GCN4 of yeast. *Cell* **46**: 885-894.
