# Supplementary material for: Independent RNA polymerase II preinitiation complex dynamics and nucleosome turnover at promoter sites in vivo
Source: HighWire-hosted journal article supplement (doi:10.1101/gr.157792.113), 2013-12-02
Supplement: Supplemental_Table.xlsx [file Supplemental_Table.xlsx]

## Sheet: FIGURE 1 C - D
	FIGURE 1 PANEL C
	ChIP: HA TBP
	Strain: None
	FBA1 PRO	time point	T0			T10			T30			T60
			PCR1	PCR2		PCR1	PCR2		PCR1	PCR2		PCR1	PCR2
		input 0.40%	23.31	23.38		23.34	23.17		23.36	23.49		23.52	23.58
		input 0.004%	30.4	30.3		30.12	30.35		30.35	30.69		31.18	30.49
		slope	-3.5			-3.49			-3.55			-3.64
		IP	24.43	24.58		24.8	24.99		25.11	25.15		24.66	24.62
		HA TBP ChIP (%)	0.192			0.141			0.14			0.2
		HA TBP (T0=100)	100			73.2			72.8			104
	Strain: Constitutive
	FBA1 PRO	time point	T0			T30			T60
			PCR1	PCR2		PCR1	PCR2		PCR1	PCR2
		input 0.40%	23.14	23.03		23.05	23.13		22.82	22.77
		input 0.004%	30.32	30.25		30.13	30.07		29.63	30.08
		slope	-3.61			-3.51			-3.53
		IP	26.23	26.41		26.78	26.67		26.73	26.73
		HA TBP ChIP (%)	0.05			0.038			0.032
Normalized to None		HA TBP	26			19.6			16.5
	Strain: Inducible
	FBA1 PRO	time point	T0			T10			T20			T30			T60
			PCR1	PCR2		PCR1	PCR2		PCR1	PCR2		PCR1	PCR2		PCR1	PCR2
		input 0.40%	22.81	23		22.21	22.25		22.64	22.6		23.07	23.01		22.41	22.51
		input 0.004%	30.13	30.11		29.36	29.36		29.57	29.55		30.09	30.31		29.51	29.52
		slope	-3.61			-3.58			-3.47			-3.59			-3.53
		IP	24.72	24.72		24.63	24.69		26.14	26.19		26.88	26.92		26.77	26.73
		HA TBP ChIP (%)	0.126			0.083			0.038			0.034			0.024
		HA TBP (T0=100)	100			65.5			30.3			26.6			19.2
	ChIP: HA TBP
	Strain: None
	tE(CUC)D PRO	time point	T0			T10			T30			T60
			PCR1	PCR2		PCR1	PCR2		PCR1	PCR2		PCR1	PCR2
		input 4.00%	22.75	22.63		22.47	22.39		22.79	22.56		22.84	22.8
		input 0.04%	29.17	29.13		29.16	29.01		29.27	29.11		29.27	29.26
		slope	-3.23			-3.33			-3.26			-3.22
		IP	24.42	24.36		24.77	24.83		24.8	24.63		24.44	24.32
		HA TBP ChIP (%)	1.196			0.88			0.952			1.308
		HA TBP (T0=100)	100			73.6			79.6			109.4
	Strain: Constitutive
	tE(CUC)D PRO	time point	T0			T30			T60
			PCR1	PCR2		PCR1	PCR2		PCR1	PCR2
		input 4.00%	22.58	22.45		22.61	22.41		22.2	22.08
		input 0.04%	28.8	28.93		28.91	28.99		28.52	28.71
		slope	-3.2			-3.22			-3.24
		IP	26.29	26.22		26.33	26.47		27.19	27.12
		HA TBP ChIP (%)	0.266			0.248			0.113
Normalized to None		HA TBP	22.2			20.7			9.4
	Strain: Inducible
	tE(CUC)D PRO	time point	T0			T10			T20			T30			T60
			PCR1	PCR2		PCR1	PCR2		PCR1	PCR2		PCR1	PCR2		PCR1	PCR2
		input 4.00%	22.32	22.15		21.78	21.65		21.98	21.77		22.39	22.29		21.74	21.62
		input 0.04%	28.98	28.81		28.39	28.14		28.48	28.32		29	29.06		28.41	28.14
		slope	-3.32			-3.27			-3.26			-3.35			-3.3
		IP	24.32	24.23		24.32	24.21		25.27	25.16		26.14	26.08		26.92	26.87
		HA TBP ChIP (%)	0.968			0.664			0.46			0.246			0.105
		HA TBP (T0=100)	100			68.6			47.5			25.4			10.8
	ChIP: HA TBP
	Strain: None
	35S PRO	time point	T0			T10			T30			T60
			PCR1	PCR2		PCR1	PCR2		PCR1	PCR2		PCR1	PCR2
		input 4.00%	23.08	23.11		22.9	23.05		23.18	23.15		23.12	23.23
		input 0.04%	29.69	30.05		29.75	30.12		29.65	29.87		30.29	29.75
		slope	-3.39			-3.47			-3.31			-3.43
		IP	26.52	26.89		26.93	27.02		26.93	26.86		26.37	26.46
		HA TBP ChIP (%)	0.355			0.28			0.309			0.42
		HA TBP (T0=100)	100			79			87			118.4
	Strain: Constitutive
	35S PRO	time point	T0			T30			T60
			PCR1	PCR2		PCR1	PCR2		PCR1	PCR2
		input 4.00%	22.9	23.04		22.94	23.14		22.85	22.96
		input 0.04%	30	29.99		30.37	30.1		29.91	30.22
		slope	-3.5			-3.58			-3.57
		IP	28.8	28.72		29.39	29.03		29.39	29.07
		HA TBP ChIP (%)	0.09			0.092			0.059
Normalized to None		HA TBP	25.3			25.8			16.6
	Strain: Inducible
	35S PRO	time point	T0			T10			T20			T30			T60
			PCR1	PCR2		PCR1	PCR2		PCR1	PCR2		PCR1	PCR2		PCR1	PCR2
		input 4.00%	23.2	23.12		22.68	22.7		22.95	22.96		23.4	23.35		22.9	22.99
		input 0.04%	29.87	30.07		30.23	30.4		30.05	29.37		30.26	30.23		29.51	29.46
		slope	-3.38			-3.7			-3.38			-3.43			-3.27
		IP	27.17	27.03		27.1	27.15		27.32	27.22		27.51	27.54		26.69	26.5
		HA TBP ChIP (%)	0.294			0.246			0.205			0.261			0.302
		HA TBP (T0=100)	100			83.7			69.8			88.8			102.9
	FIGURE 1 PANEL D
	ChIP: HA TBP
	Strain: None
	GAL1 PRO	time point	T0			T10			T30			T60
			PCR1	PCR2		PCR1	PCR2		PCR1	PCR2		PCR1	PCR2
		input 0.40%	23.8964	24.144		23.8973	23.9208		24.1549	24.2423		23.6263	23.6586
		input 0.004%	32.2147	32.5661		32.4914	32.3476		32.5302	31.947		32.6328	31.7552
		slope	-4.18			4.2			-4.02			-4.2
		IP	27.6629	27.5132		25.9575	26.232		23.2119	23.2417		21.7486	21.6858
		HA TBP ChIP (%)	0.059			0.1216			0.6879			1.1163
		HA TBP (T60=100)	5.2			10.9			61.6			100
	Strain: Constitutive
	GAL1 PRO	time point	T0			T30			T60
			PCR1	PCR2		PCR1	PCR2		PCR1	PCR2
		input 0.40%	23.3705	23.4796		23.1628	23.26		23.465	23.5609
		input 0.004%	31.7221	31.2507		30.9679	30.6989		31.6196	31.5827
		slope	-4.03			-3.81			-4.04
		IP	28.2057	28.3566		24.9928	25.0707		24.8407	24.6237
		HA TBP ChIP (%)	0.0246			0.1399			0.1956
Normalized to None		HA TBP	2.2			12.5			17.5
	Strain: Inducible
	GAL1 PRO	time point	T0			T10			T20			T30			T60
			PCR1	PCR2		PCR1	PCR2		PCR1	PCR2		PCR1	PCR2		PCR1	PCR2
		input 0.40%	23.2735	23.1827		23.1895	23.2416		23.4302	23.5043		23.3681	23.4397		23.702	23.738
		input 0.004%	30.75	31.6588		31.2458	31.4295		31.4347	30.7333		31.5688	31.0214		32.2993	31.4408
		slope	-3.98			-4.06			-3.81			-3.95			-4.07
		IP	27.279	26.8994		26.2637	26.1393		25.2829	25.3535		25.6539	25.5082		25.3607	25.679
		HA TBP ChIP (%)	0.0453			0.0748			0.1469			0.1162			0.1406
Normalized to None		HA TBP	4.1			6.7			13.2			10.4			12.6

## Sheet: FIGURE 2B
	FIGURE 2 - PANEL B
	ChIP: TBP
	TBP depletion
	FBA1 PRO	time point	T0			T2			T5			T10			T30			T60
			PCR1	PCR2		PCR1	PCR2		PCR1	PCR2		PCR1	PCR2		PCR1	PCR2		PCR1	PCR2
		input 4.00%	20.95	21.15		20.81	20.98		20.7911	20.8706		20.7174	20.7813		20.8782	20.8764		20.9104	21.0177
		input 0.04%	27.8	28		28.35	28.6		27.9049	27.7155		27.9069	27.8783		28.0059	27.8104		27.9637	27.9345
		slope	-3.43			-3.75			-3.49			-3.53			-3.52			-3.49
		IP	25.51	24.91		25.57	25.46		27.4578	27.1272		27.5429	27.645		28.8836	28.8372		29.2731	29.4063
		TBP ChIP (%)	0.257			0.227			0.057			0.048			0.022			0.016
		TBP (T0=100)	100			88.4			22.3			18.7			8.6			6.3
	tE(CUC)D PRO	time point	T0			T2			T5			T10			T30			T60
			PCR1	PCR2		PCR1	PCR2		PCR1	PCR2		PCR1	PCR2		PCR1	PCR2		PCR1	PCR2
		input 4.00%	22.02	21.77		21.77	21.56		21.74	21.72		21.54	21.53		21.51	21.39		21.62	21.53
		input 0.04%	28.18	28.02		28.09	28.04		28.6	28.28		28.2	28		28.06	27.88		28.06	28.11
		slope	-3.11			-3.2			-3.36			-3.26			-3.2			-3.25
		IP	22.46	22.41		22.46	22.34		22.73	22.73		23.05	23		24.06	24.11		25.45	25.2
		TBP ChIP (%)	2.676			2.36			2.016			1.408			0.62			0.284
		TBP (T0=100)	100			88.2			75.3			52.6			23.2			10.6
	35S PRO	time point	T0			T2			T5			T10			T30			T60
			PCR1	PCR2		PCR1	PCR2		PCR1	PCR2		PCR1	PCR2		PCR1	PCR2		PCR1	PCR2
		input 4.00%	20.0968	20.1274		19.7507	19.8662		19.8732	19.8369		19.8137	19.7432		20.1126	19.9099		20.0194	20.1173
		input 0.04%	26.6453	27.1073		26.873	26.6971		26.5101	26.575		26.4646	26.8207		26.8796	26.9165		27.1194	26.9767
		slope	-3.38			-3.49			-3.34			-3.43			-3.44			-3.49
		IP	24.2492	23.907		23.586	23.5525		23.6294	23.6426		23.5204	23.532		24.1065	24.0965		25.019	24.8267
		TBP ChIP (%)	0.271			0.333			0.313			0.329			0.261			0.165
		TBP (T0=100)	100			123.1			115.8			121.6			96.3			61.1

## Sheet: FIGURE 2C
	FIGURE 2 PANEL C - TFIID independent genes
	ChIP: TBP
	TBP depletion
	FBA1 PRO	time point	T0			T2			T5			T10			T30			T60
			PCR1	PCR2		PCR1	PCR2		PCR1	PCR2		PCR1	PCR2		PCR1	PCR2		PCR1	PCR2
		input 4.00%	20.95	21.15		20.81	20.98		20.7911	20.8706		20.7174	20.7813		20.8782	20.8764		20.9104	21.0177
		input 0.04%	27.8	28		28.35	28.6		27.9049	27.7155		27.9069	27.8783		28.0059	27.8104		27.9637	27.9345
		slope	-3.43			-3.75			-3.49			-3.53			-3.52			-3.49
		IP	25.51	24.91		25.57	25.46		27.4578	27.1272		27.5429	27.645		28.8836	28.8372		29.2731	29.4063
		TBP ChIP (%)	0.257			0.227			0.057			0.048			0.022			0.016
		TBP (T0=100)	100			88.4			22.3			18.7			8.6			6.3
	TDH3 PRO	time point	T0			T2			T5			T10			T30			T60
			PCR1	PCR2		PCR1	PCR2		PCR1	PCR2		PCR1	PCR2		PCR1	PCR2		PCR1	PCR2
		input 4.00%	21.75	21.77		21.39	21.36		21.47	21.37		21.42	21.37		21.58	21.45		21.57	21.42
		input 0.04%	28.46	28.31		27.97	28.11		28.09	28		28.02	28.04		27.84	27.93		28.13	28.05
		slope	-3.31			-3.33			-3.32			-3.32			-3.2			-3.3
		IP	26.02	25.98		26.16	26.12		27.53	27.47		28.1	27.76		28.78	29.06		29.63	29.58
		TBP ChIP (%)	0.21			0.149			0.059			0.043			0.019			0.014
		TBP (T0=100)	100			71			28.1			20.6			9.1			6.6
	ADH1 PRO	time point	T0			T2			T5			T10			T30			T60
			PCR1	PCR2		PCR1	PCR2		PCR1	PCR2		PCR1	PCR2		PCR1	PCR2		PCR1	PCR2
		input 4.00%	21.8799	21.8741		21.6912	21.6784		21.5121	21.5388		21.3806	21.3027		21.4856	21.4913		21.4606	21.3783
		input 0.04%	29.2629	29.4141		29.3426	28.9735		28.8403	28.8294		28.695	28.5338		28.8707	29.3179		28.8498	28.8498
		slope	-3.73			-3.74			-3.65			-3.63			-3.8			-3.77
		IP	26.7204	26.7112		26.6675	26.5873		29.5457	29.2285		29.2263	28.8143		30.8221	30.3485		31.5721	31.1099
		TBP ChIP (%)	0.209			0.19			0.029			0.034			0.016			0.015
		TBP (T0=100)	100			90.63			13.81			16.13			7.68			7.36
	CDC19 PRO	time point	T0			T2			T5			T10			T30			T60
			PCR1	PCR2		PCR1	PCR2		PCR1	PCR2		PCR1	PCR2		PCR1	PCR2		PCR1	PCR2
		input 0.40%	21.285	21.3276		21.1589	21.1768		21.0081	20.9841		20.9119	20.9285		21.1042	20.8748		20.8733	20.9796
		input 0.004%	28.732	28.8228		28.6687	28.6015		28.233	28.5786		28.1082	28.1143		28.702	28.7923		28.9162	28.7543
		slope	-3.74			-3.73			-3.7			-3.6			-3.87			-3.9
		IP	21.6482	21.5829		21.894	21.7693		23.8166	23.7503		24.0804	23.8418		25.2736	25.2563		25.6904	25.3893
		TBP ChIP (%)	0.348			0.263			0.072			0.061			0.031			0.027
		TBP (T0=100)	100			75.59			20.55			17.39			8.79			7.77
	CYC1 PRO	time point	T0			T2			T5			T10			T30			T60
			PCR1	PCR2		PCR1	PCR2		PCR1	PCR2		PCR1	PCR2		PCR1	PCR2		PCR1	PCR2
		input 0.40%	21.3155	21.3043		20.9891	21.2627		21.1175	21.0983		20.9859	21.3562		21.234	20.9783		21.26	21.1291
		input 0.004%	28.4833	28.7616		28.6222	28.309		28.3354	28.3957		28.3683	27.9756		28.4954	28.4164		28.696	28.4294
		slope	-3.65			-3.67			-3.63			-3.5			-3.67			-3.68
		IP	22.4412	22.3067		22.6494	22.6884		24.2769	24.2636		24.812	24.6746		25.8599	25.7865		26.1747	25.8443
		TBP ChIP (%)	0.209			0.15			0.052			0.039			0.021			0.021
		TBP (T0=100)	100			71.82			25.13			18.65			10.09			9.67

## Sheet: FIGURE 2D
	FIGURE 2 PANEL D - TFIID dependent genes
	ChIP: TBP
	TBP depletion
	FBA1 PRO	time point	T0			T2			T5			T10			T30			T60
			PCR1	PCR2		PCR1	PCR2		PCR1	PCR2		PCR1	PCR2		PCR1	PCR2		PCR1	PCR2
		input 4.00%	20.95	21.15		20.81	20.98		20.7911	20.8706		20.7174	20.7813		20.8782	20.8764		20.9104	21.0177
		input 0.04%	27.8	28		28.35	28.6		27.9049	27.7155		27.9069	27.8783		28.0059	27.8104		27.9637	27.9345
		slope	-3.43			-3.75			-3.49			-3.53			-3.52			-3.49
		IP	25.51	24.91		25.57	25.46		27.4578	27.1272		27.5429	27.645		28.8836	28.8372		29.2731	29.4063
		TBP ChIP (%)	0.257			0.227			0.057			0.048			0.022			0.016
		TBP (T0=100)	100			88.4			22.3			18.7			8.6			6.3
	ACT1 PRO	time point	T0			T2			T5			T10			T30			T60
			PCR1	PCR2		PCR1	PCR2		PCR1	PCR2		PCR1	PCR2		PCR1	PCR2		PCR1	PCR2
		input 4.00%	21.9187	21.938		21.7836	21.7108		21.5757	21.6003		21.4202	21.529		21.5592	21.638		21.6562	21.7613
		input 0.04%	29.305	29.1765		29.1212	29.4195		28.8578	28.7321		28.7327	28.609		29.1407	28.6272		29.2919	29.2142
		slope	-3.66			-3.76			-3.6			-3.59			-3.64			-3.77
		IP	26.7848	26.7535		27.1402	27.1688		28.9133	28.5177		28.5164	28.6374		29.8467	29.9941		30.3695	30.7909
		TBP ChIP (%)	0.197			0.141			0.044			0.044			0.021			0.018
		TBP (T0=100)	100			71.46			22.3			22.55			10.45			8.89
	RPL9B PRO	time point	T0			T2			T5			T10			T30			T60
			PCR1	PCR2		PCR1	PCR2		PCR1	PCR2		PCR1	PCR2		PCR1	PCR2		PCR1	PCR2
		input 4.00%	21.61	21.53		21.37	21.27		21.29	21.4		21.24	21.27		21.34	21.35		21.55	21.41
		input 0.04%	28.12	28.05		28.02	27.69		27.89	27.6		27.87	28.04		28.01	27.89		28.29	28.29
		slope	-3.26			-3.27			-3.2			-3.35			-3.3			-3.41
		IP	25.3	25.27		25.31	25.33		26.76	26.86		27.14	27.19		28.74	28.4		29.03	29.09
		TBP ChIP (%)	0.29			0.238			0.078			0.069			0.026			0.024
		TBP (T0=100)	100			82			27			23.7			9			8.2
	RPS12 PRO	time point	T0			T2			T5			T10			T30			T60
			PCR1	PCR2		PCR1	PCR2		PCR1	PCR2		PCR1	PCR2		PCR1	PCR2		PCR1	PCR2
		input 4.00%	21.39	21.36		21.11	21.1		21.13	21.04		21.07	20.99		21.14	21.15		21.08	21.06
		input 0.04%	28.15	27.85		27.34	27.67		27.5	27.47		27.36	27.47		27.47	27.33		27.48	27.44
		slope	-3.31			-3.2			-3.2			-3.2			-3.13			-3.36
		IP	25.91	25.87		26.1	26.17		27.01	27.14		27.38	27.38		28.39	28.39		29.09	29.09
		TBP ChIP (%)	0.174			0.108			0.054			0.041			0.019			0.012
		TBP (T0=100)	100			61.8			30.8			23.4			11.1			7.1

## Sheet: FIGURE 2E
	FIGURE 2 PANEL E - Rap1 Regulated Genes (Exp #1)
	ChIP: TBP
	TBP depletion
	FBA1 PRO	time point	T0			T2			T5			T10			T30			T60
			PCR1	PCR2		PCR1	PCR2		PCR1	PCR2		PCR1	PCR2		PCR1	PCR2		PCR1	PCR2
		input 4.00%	20.95	21.15		20.81	20.98		20.7911	20.8706		20.7174	20.7813		20.8782	20.8764		20.9104	21.0177
		input 0.04%	27.8	28		28.35	28.6		27.9049	27.7155		27.9069	27.8783		28.0059	27.8104		27.9637	27.9345
		slope	-3.43			-3.75			-3.49			-3.53			-3.52			-3.49
		IP	25.51	24.91		25.57	25.46		27.4578	27.1272		27.5429	27.645		28.8836	28.8372		29.2731	29.4063
		TBP ChIP (%)	0.257			0.227			0.057			0.048			0.022			0.016
		TBP (T0=100)	100			88.4			22.3			18.7			8.6			6.3
	RPS5 PRO	time point	T0			T2			T5			T10			T30			T60
			PCR1	PCR2		PCR1	PCR2		PCR1	PCR2		PCR1	PCR2		PCR1	PCR2		PCR1	PCR2
		input 4.00%	22.06	21.91		21.67	21.62		21.74	21.63		21.59	21.53		21.72	21.73		21.92	21.82
		input 0.04%	28.43	28.4		28.32	28.15		28.25	28.13		28	27.83		28.15	28.23		28.43	28.13
		slope	-3.21			-3.3			-3.25			-3.2			-3.23			-3.21
		IP	26.64	26.4		26.8	26.61		27.4	27.37		27.67	27.4		29.19	29.04		29.45	29.41
		TBP ChIP (%)	0.156			0.116			0.07			0.053			0.021			0.017
		TBP (T0=100)	100			74.8			45.2			33.9			13.4			11.2
	RPL21A PRO	time point	T0			T2			T5			T10			T30			T60
			PCR1	PCR2		PCR1	PCR2		PCR1	PCR2		PCR1	PCR2		PCR1	PCR2		PCR1	PCR2
		input 0.40%	21.5507	21.5775		21.3386	21.5944		21.3671	21.393		21.3165	21.3151		21.4186	21.6301		21.4159	21.4604
		input 0.004%	28.7467	28.9164		28.895	28.6868		28.6837	28.6497		28.2294	28.2778		28.6606	28.7985		29.0838	28.8105
		slope	-3.67			-3.66			-3.64			-3.47			-3.6			-3.75
		IP	23.4135	23.4513		23.571	23.5235		24.6029	24.5061		24.8812	24.6539		26.2317	26.2215		26.641	26.6725
		TBP ChIP (%)	0.127			0.108			0.056			0.044			0.0196			0.0165
		TBP (T0=100)	100			85.49			44.29			34.86			15.5			13.05
	RPL2B PRO	time point	T0			T2			T5			T10			T30			T60
			PCR1	PCR2		PCR1	PCR2		PCR1	PCR2		PCR1	PCR2		PCR1	PCR2		PCR1	PCR2
		input 0.40%	22.4119	22.5574		22.1284	22.2559		22.0932	22.1497		21.9258	21.9345		22.1548	22.1734		22.1962	22.0264
		input 0.004%	30.3276	30.6778		29.8236	30.296		29.9776	29.7395		29.6072	29.127		29.7249	29.8983		30.3808	30.7958
		slope	-3.99			-3.93			-3.86			-3.72			-3.82			-3.99
		IP	23.7877	23.6763		24.1271	24.0493		24.9545	24.8022		25.1378	25.0216		26.8479	26.7378		27.5301	27.4969
		TBP ChIP (%)	0.199			0.131			0.08			0.063			0.026			0.021
		TBP (T0=100)	100			65.47			40.27			31.65			12.92			10.5

## Sheet: FIGURE 3C
	FIGURE 3C TOP PANEL									FIGURE 3C LOWER PANEL
	ChIP: Histone H3 Normalized to TEL									ChIP: TBP - TBP DEPLETION
	Strain: WT									Strain: WT
	FBA1 PRO	time point	T0			T80				FBA1 PRO	time point	T0			T5			T10			T30
			PCR1	PCR2		PCR1	PCR2					PCR1	PCR2		PCR1	PCR2		PCR1	PCR2		PCR1	PCR2
		input 4.00%	23.28	23.16		23.29	23.19				input 4.00%	23.29	23.19		23.27	23.18		23.25	23.12		23.24	23.16
		input 0.04%	29.99	29.58		29.85	29.44				input 0.04%	29.85	29.44		29.34	29.17		29.85	29.44		29.82	29.61
		slope	-3.28			-3.42					slope	-3.42			-3.1			-3.23			-3.26
		IP	27.03	27.06		26.94	26.88				IP	26.78	26.66		28.47	28.42		29.15	29.19		30.25	30.26
		H3 ChIP (%)	0.15			0.2					TBP ChIP (%)	0.328			0.074			0.056			0.027
		H3 (T0=100)	100			133.3					TBP (T0=100)	100			22.6			17.1			8.2
	Strain: spt6 Ts									Strain: spt6 Ts
	FBA1 PRO	time point	T0			T80				FBA1 PRO	time point	T0			T5			T10			T30
			PCR1	PCR2		PCR1	PCR2					PCR1	PCR2		PCR1	PCR2		PCR1	PCR2		PCR1	PCR2
		input 4.00%	22.69	22.52		23.4	23.3				input 4.00%	23.4	23.3		23.57	23.63		23.13	23.07		22.88	22.7
		input 0.04%	29.08	28.85		30.05	29.63				input 0.04%	30.05	29.63		29.95	30.16		29.62	29.45		29.56	29.18
		slope	-3.2			-3.24					slope	-3.24			-3.23			-3.22			-3.34
		IP	26.86	27.07		28.76	29.11				IP	26.89	26.76		29.54	29.02		28.97	29.25		29.28	29.6
		H3 ChIP (%)	0.09			0.02					TBP ChIP (%)	0.341			0.07			0.054			0.038
		H3 (T0 WT=100)	60			13.3					TBP (T0=100)	100			20.5			15.8			11.1
	Strain: WT									Strain: WT
	ADH1 PRO	time point	T0			T80				ADH1 PRO	time point	T0			T5			T10			T30
			PCR1	PCR2		PCR1	PCR2					PCR1	PCR2		PCR1	PCR2		PCR1	PCR2		PCR1	PCR2
		input 4.00%	24.51	24.08		24.26	24.21				input 4.00%	24.26	24.21		24.18	24.17		24.19	24.14		24.16	24.04
		input 0.04%	30.42	30.55		30.76	30.77				input 0.04%	30.76	30.77		30.42	30.61		30.53	31.08		30.85	30.34
		slope	-3.1			-3.26					slope	-3.26			-3.2			-3.32			-3.25
		IP	26.83	26.75		26.68	26.47				IP	27.54	28.04		30.28	30.26		30.72	30.8		31.29	31.38
		H3 ChIP (%)	0.34			0.53					TBP ChIP (%)	0.33			0.048			0.041			0.024
		H3 (T0=100)	100			155.8					TBP (T0=100)	100			14.5			12.4			7.3
	Strain: spt6 Ts									Strain: spt6 Ts
	ADH1 PRO	time point	T0			T80				ADH1 PRO	time point	T0			T5			T10			T30
			PCR1	PCR2		PCR1	PCR2					PCR1	PCR2		PCR1	PCR2		PCR1	PCR2		PCR1	PCR2
		input 4.00%	23.53	23.4		24.26	24.18				input 4.00%	24.26	24.18		24.42	24.27		24.07	24.01		23.75	23.61
		input 0.04%	30.01	29.94		31.02	30.98				input 0.04%	31.02	30.98		30.68	30.65		30.6	30.63		30.38	30.35
		slope	-3.25			-3.39					slope	-3.39			-3.16			-3.3			-3.34
		IP	27.34	27.37		29.78	29.91				IP	26.74	26.74		28.57	28.6		29.2	29.09		30.14	30.22
		H3 ChIP (%)	0.14			0.03					TBP ChIP (%)	0.724			0.182			0.112			0.046
		H3 (T0 WT=100)	41.2			8.81					TBP (T0=100)	100			25.1			15.5			6.4
	Strain: WT									Strain: WT
	RPL9B PRO	time point	T0			T80				RPL9B PRO	time point	T0			T5			T10			T30
			PCR1	PCR2		PCR1	PCR2					PCR1	PCR2		PCR1	PCR2		PCR1	PCR2		PCR1	PCR2
		input 4.00%	24.1	23.96		24.2	24.04				input 4.00%	24.2	24.04		24.18	24.22		24.15	24.09		24.21	23.96
		input 0.04%	31.13	30.72		31.65	31.1				input 0.04%	31.65	31.1		30.79	30.66		31.01	30.34		31.26	30.34
		slope	-3.45			-3.62					slope	-3.62			-3.3			-3.3			-3.4
		IP	27.25	27.27		27.48	27.32				IP	26.8	26.61		28.07	28.04		28.64	28.54		29.39	29.43
		H3 ChIP (%)	0.25			0.35					TBP ChIP (%)	0.776			0.264			0.174			0.104
		H3 (T0=100)	100			140					TBP (T0=100)	100			34			22.4			13.4
	Strain: spt6 Ts									Strain: spt6 Ts
	RPL9B PRO	time point	T0			T80				RPL9B PRO	time point	T0			T5			T10			T30
			PCR1	PCR2		PCR1	PCR2					PCR1	PCR2		PCR1	PCR2		PCR1	PCR2		PCR1	PCR2
		input 4.00%	23.28	23.19		24.23	24.15				input 4.00%	24.23	24.15		24.43	24.38		23.88	23.82		23.5	23.44
		input 0.04%	30.41	29.96		30.89	30.61				input 0.04%	30.89	30.61		31.09	31.18		30.64	30.8		30.34	31.29
		slope	-3.5			-3.3					slope	-3.3			-3.37			-3.4			-3.7
		IP	27.28	27.26		28.55	28.45				IP	27.28	27.18		29.28	29.39		29.71	29.36		30.12	30.14
		H3 ChIP (%)	0.15			0.06					TBP ChIP (%)	0.472			0.137			0.089			0.061
		H3 (T0 WT=100)	60			24					TBP (T0=100)	100			29			18.9			12.9
	Strain: WT									Strain: WT
	ACT1 PRO	time point	T0			T80				ACT1 PRO	time point	T0			T5			T10			T30
			PCR1	PCR2		PCR1	PCR2					PCR1	PCR2		PCR1	PCR2		PCR1	PCR2		PCR1	PCR2
		input 4.00%	24.28	24.03		24.07	24.05				input 4.00%	24.31	24.25		24.41	24.39		24.37	24.29		24.25	24.14
		input 0.04%	30.41	30.58		30.98	30.34				input 0.04%	31.91	31.48		31.05	31.38		30.95	31.05		31.02	30.77
		slope	-3.2			-3.3					slope	-3.7			-3.41			-3.33			-3.35
		IP	28.03	28.19		28.25	28.44				IP	28.31	28.21		29.26	29.24		30.2	30.27		30.72	31
		H3 ChIP (%)	0.12			0.14					TBP ChIP (%)	0.337			0.151			0.068			0.041
		H3 (T0=100)	100			116.7					TBP (T0=100)	100			44.8			20.2			12.2
	Strain: spt6 Ts									Strain: spt6 Ts
	ACT1 PRO	time point	T0			T80				ACT1 PRO	time point	T0			T5			T10			T30
			PCR1	PCR2		PCR1	PCR2					PCR1	PCR2		PCR1	PCR2		PCR1	PCR2		PCR1	PCR2
		input 4.00%	23.34	23.27		23.79	23.9				input 4.00%	24.27	24.43		24.45	24.52		24.16	24.12		23.74	23.62
		input 0.04%	30.03	30.16		30.47	30.82				input 0.04%	30.99	31.25		31.31	31.13		31.47	30.95		31.22	31.03
		slope	-3.4			-3.4					slope	-3.4			-3.4			-3.53			-3.34
		IP	28.22	28.23		30.14	30.36				IP	29.12	29.21		31.14	31.06		31	31		31.12	31.9
		H3 ChIP (%)	0.08			0.02					TBP ChIP (%)	0.151			0.044			0.046			0.032
		H3 (T0 WT=100)	66.7			16.7					TBP (T0=100)	100			29.1			30.5			21.2

## Sheet: FIGURE 4B
	FIGURE 4 PANEL B
	ChIP: TBP
	TBP Depletion
	CDC19 PRO	time point	T0			T10			T20			T40			T60
			PCR1	PCR2		PCR1	PCR2		PCR1	PCR2		PCR1	PCR2		PCR1	PCR2
		input 2.00%	22.6476	22.7603		23.1952	23.1729		22.7632	22.8387		22.6464	22.741		22.7204	22.6098
		input 0.02%	29.8161	30.1878		30.1268	30.3758		30.0292	30.1339		29.6299	29.904		30.0318	30.0089
		slope	-3.64901			-3.53365			-3.64032			-3.5366			-3.67762
		IP	26.8167	27.0181		27.664	27.6055		29.37	29.57		29.7683	29.8909		30.0105	30.5366
		TBP ChIP (%)	0.140355			0.110048			0.0295041			0.0192157			0.0172997
	ADH1 PRO	time point	T0			T10			T20			T40			T60
			PCR1	PCR2		PCR1	PCR2		PCR1	PCR2		PCR1	PCR2		PCR1	PCR2
		input 2.00%	22.3205	22.3001		23.5533	23.5404		23.211	23.3364		23.0396	23.1853		23.0832	23.1546
		input 0.02%	29.3617	29.335		30.5669	30.8571		30.2762	30.5176		30.0954	30.4047		30.3464	30.2529
		slope	-3.519			-3.58258			-3.56162			-3.56881			-3.59038
		IP	27.6146	27.1625		28.5338	28.3878		30.1716	29.5775		30.2075	30.5428		30.6758	30.6737
		TBP ChIP (%)	0.0728901			0.0850928			0.0285528			0.0185571			0.0157238
	STE3 PRO	time point	T0			T10			T20			T40			T60
			PCR1	PCR2		PCR1	PCR2		PCR1	PCR2		PCR1	PCR2		PCR1	PCR2
		input 2.00%	23.1043	23.2433		23.593	23.6241		23.3861	23.4507		23.2543	23.2668		23.1314	23.1355
		input 0.02%	30.9193	30.6902		31.3963	31.4714		31.0189	31.2421		30.4388	30.5485		30.8807	31.0304
		slope	-3.81549			-3.91263			-3.85604			-3.61653			-3.91108
		IP	30.6748	31.0272		30.7893	30.7093		31.4357	31.1758		30.7691	31.0541		30.9855	31.0818
		TBP ChIP (%)	0.0195599			0.0299292			0.0180674			0.0153901			0.0191087

## Sheet: FIGURE 4C
	FIGURE 4 PANEL C																		FIGURE 4 PANEL C
	ChIP: H3.HA																		ChIP: H3.HA
	Condition: Glucose																		Condition: Rapamycin
	CDC19 PRO	time point	T0			T10			T20			T40			T60				CDC19 PRO	time point	T0			T10			T20			T40			T60
			PCR1	PCR2		PCR1	PCR2		PCR1	PCR2		PCR1	PCR2		PCR1	PCR2					PCR1	PCR2		PCR1	PCR2		PCR1	PCR2		PCR1	PCR2		PCR1	PCR2
		input 20.00%	22.8509	22.8452		22.815	22.8006		23.0286	22.7401		23.3627	23.3719		22.7313	22.7512				input 20.00%	22.7798	22.7345		23.1604	23.096		22.7321	22.7812		22.5408	22.7215		23.2037	22.5873
		input 0.2%	30.0162	29.714		30.0158	29.8446		29.8745	29.7032		30.1871	30.1429		29.9635	30.0131				input 0.2%	29.8976	29.8391		30.3384	30.4078		29.9154	30.0196		29.722	29.6156		29.9658	29.7634
		slope	-3.50851			-3.5612			-3.45224			-3.39887			-3.62352					slope	-3.55558			-3.62247			-3.60543			-3.51882			-3.48454
		IP	32.8018	34.0618		33.5131	33.988		31.6344	31.236		29.3668	29.4374		28.4113	28.5234				IP	34.2343	33.8559		33.4349	33.6625		30.1434	30.2129		28.4197	28.451		28.2797	28.4767
		HA.H3 ChIP (%)	0.0209196			0.0171142			0.0672907			0.335434			0.526083					HA.H3 ChIP (%)	0.0134761			0.02664			0.174871			0.448303			0.535208
	ADH1 PRO	time point	T0			T10			T20			T40			T60				ADH1 PRO	time point	T0			T10			T20			T40			T60
			PCR1	PCR2		PCR1	PCR2		PCR1	PCR2		PCR1	PCR2		PCR1	PCR2					PCR1	PCR2		PCR1	PCR2		PCR1	PCR2		PCR1	PCR2		PCR1	PCR2
		input 20.00%	23.1021	23.1115		23.1419	23.0996		23.3834	23.1559		23.8513	23.5217		22.6969	22.6044				input 20.00%	23.0367	23.0047		23.401	23.3578		22.7238	22.8438		22.891	23.013		22.9055	22.9906
		input 0.2%	30.4144	30.3517		30.4426	30.4342		30.4948	30.3111		30.922	30.787		29.7346	29.8789				input 0.2%	30.4817	30.5441		30.6879	30.5603		29.9099	30.1176		30.12	30.0685		30.2178	30.3759
		slope	-3.63814			-3.65882			-3.56667			-3.584			-3.57804					slope	-3.7461			-3.62235			-3.61496			-3.5711			-3.67443
		IP	34.348	34.0576		34.4472	33.7107		31.0503	31.2151		29.1656	29.1804		27.7608	27.8358				IP	33.261	34.7605		33.7241	34.366		30.6295	30.5935		29.6131	29.6215		29.6075	29.8008
		HA.H3 ChIP (%)	0.0179045			0.0207767			0.125042			0.589117			0.728582					HA.H3 ChIP (%)	0.0258144			0.0232061			0.136681			0.272013			0.290491
	STE3 PRO	time point	T0			T10			T20			T40			T60				STE3 PRO	time point	T0			T10			T20			T40			T60
			PCR1	PCR2		PCR1	PCR2		PCR1	PCR2		PCR1	PCR2		PCR1	PCR2					PCR1	PCR2		PCR1	PCR2		PCR1	PCR2		PCR1	PCR2		PCR1	PCR2
		input 20.00%	23.2806	23.2897		23.2745	23.3021		23.595	23.3494		23.9511	23.718		23.2622	23.0841				input 20.00%	23.2262	23.1897		23.3955	23.3215		23.0431	23.1434		23.2266	23.2882		23.2198	23.2955
		input 0.2%	30.6757	30.7007		30.533	30.9307		30.7747	30.343		31.1646	31.7452		30.6753	30.7162				input 0.2%	31.1618	30.6844		30.7858	31.3576		30.8441	30.5932		30.6069	30.6915		30.7376	30.9852
		slope	-3.70152			-3.72178			-3.54331			-3.81016			-3.76129					slope	-3.85757			-3.85661			-3.81271			-3.69587			-3.80186
		IP	33.3639	33.3617		34.9643	34.3399		34.0068	33.5581		32.9003	33.8605		32.2041	32.7227				IP	34.3804	33.8951		34.1149	34.6679		33.0311	33.369		32.5803	32.153		32.3514	32.9358
		HA.H3 ChIP (%)	0.0378845			0.0180205			0.0248805			0.0651167			0.0686325					HA.H3 ChIP (%)	0.0296643			0.027934			0.0449228			0.0692082			0.0690276

## Sheet: FIGURE S4 D-E
	FIGURE S4 PANEL D & E
	ChIP: TBP
	TBP depletion
	PMA1 PRO	time point	T0			T2			T5			T10			T30			T60
			PCR1	PCR2		PCR1	PCR2		PCR1	PCR2		PCR1	PCR2		PCR1	PCR2		PCR1	PCR2
		input 4.00%	23.07	23.01		22.88	22.73		22.68	22.58		22.44	22.39		22.49	22.57		22.76	22.62
		input 0.04%	30.35	29.92		30.12	29.61		29.52	29.44		29.69	29.4		29.98	29.35		29.42	29.36
		slope	-3.55			-3.53			-3.43			-3.57			-3.57			-3.35
		IP	28.41	28.07		28.61	28.36		30.53	31.07		31.05	30.65		31.18	31.43		31.27	31.74
		TBP ChIP (%)	0.138			0.099			0.017			0.017			0.014			0.009
		TBP (T0=100)	100			72.1			12.2			12.6			10.1			6.9
	FCY2 PRO	time point	T0			T2			T5			T10			T30			T60
			PCR1	PCR2		PCR1	PCR2		PCR1	PCR2		PCR1	PCR2		PCR1	PCR2		PCR1	PCR2
		input 0.40%	21.35	21.36		21.06	21.08		21.14	21.08		20.98	21.06		21.15	21.1		21.13	21.16
		input 0.004%	27.46	27.61		27.48	27.44		27.65	27.64		27.3	27.44		27.56	27.46		27.4	27.4
		slope	-3.1			-3.2			-3.27			-3.18			-3.2			-3.13
		IP	23.31	23.42		23.74	23.73		25.21	25.23		25.34	25.36		26.12	26.38		26.27	26.39
		TBP ChIP (%)	0.09			0.059			0.022			0.017			0.01			0.009
		TBP (T0=100)	100			65.6			24.7			19.4			11.1			9.8
	MRH1 PRO	time point	T0			T2			T5			T10			T30			T60
			PCR1	PCR2		PCR1	PCR2		PCR1	PCR2		PCR1	PCR2		PCR1	PCR2		PCR1	PCR2
		input 0.40%	21.17	21.2		21.05	20.94		21.09	21.19		20.97	21.04		21.16	21.11		21.28	21.16
		input 0.004%	27.41	27.51		27.62	27.46		27.51	27.72		27.43	27.55		27.63	27.59		27.72	27.97
		slope	-3.14			-3.27			-3.24			-3.24			-3.24			-3.31
		IP	25.48	25.76		25.48	25.52		27.15	27.13		27.24	27.47		27.76	27.84		27.33	27.48
		TBP ChIP (%)	0.016			0.017			0.006			0.004			0.004			0.005
		TBP (T0=100)	100			108.2			36.1			28.4			22.6			35.1

## Sheet: FIGURE S5
	FIGURE S5 - Rap1 regulated genes - Exp #2																	FIGURE S5 - tRNA genes - Exp #1
	ChIP: TBP																	ChIP: TBP
	TBP depletion																	TBP depletion
	FBA1 PRO	time point	T0			T5			T10			T30			T60			FBA1 PRO	time point	T0			T2			T5			T10			T30			T60
			PCR1	PCR2		PCR1	PCR2		PCR1	PCR2		PCR1	PCR2		PCR1	PCR2				PCR1	PCR2		PCR1	PCR2		PCR1	PCR2		PCR1	PCR2		PCR1	PCR2		PCR1	PCR2
		input 0.40%	22.01	22		22.02	22.05		22.01	21.98		22.09	22.13		22.26	22.32			input 4.00%	20.95	21.15		20.81	20.98		20.7911	20.8706		20.7174	20.7813		20.8782	20.8764		20.9104	21.0177
		input 0.004%	29.05	29.27		28.84	29.19		29.2	29.19		29.15	29.09		29.22	29.61			input 0.04%	27.8	28		28.35	28.6		27.9049	27.7155		27.9069	27.8783		28.0059	27.8104		27.9637	27.9345
		slope	-3.58			-3.49			-3.53			-3.52			-3.49				slope	-3.43			-3.75			-3.49			-3.53			-3.52			-3.49
		IP	22.37	22.51		24.02	24.12		25.22	25.25		26.46	26.68		27.33	27.42			IP	25.51	24.91		25.57	25.46		27.4578	27.1272		27.5429	27.645		28.8836	28.8372		29.2731	29.4063
		TBP ChIP (%)	0.286			0.102			0.047			0.021			0.014				TBP ChIP (%)	0.257			0.227			0.057			0.048			0.022			0.016
		TBP (T0=100)	100			35.9			16.5			7.3			4.9				TBP (T0=100)	100			88.4			22.3			18.7			8.6			6.3
	RPL21A PRO	time point	T0			T5			T10			T30			T60			tE(CUC)D PRO	time point	T0			T2			T5			T10			T30			T60
			PCR1	PCR2		PCR1	PCR2		PCR1	PCR2		PCR1	PCR2		PCR1	PCR2				PCR1	PCR2		PCR1	PCR2		PCR1	PCR2		PCR1	PCR2		PCR1	PCR2		PCR1	PCR2
		input 0.40%	22.11	22.13		22.26	22.29		22.3	22.21		22.36	22.44		22.53	22.57			input 4.00%	22.02	21.77		21.77	21.56		21.74	21.72		21.54	21.53		21.51	21.39		21.62	21.53
		input 0.004%	29.02	29.21		29.31	29.31		29.46	29.67		29.34	29.49		29.83	29.76			input 0.04%	28.18	28.02		28.09	28.04		28.6	28.28		28.2	28		28.06	27.88		28.06	28.11
		slope	-3.5			-3.5			-3.65			-3.51			-3.62				slope	-3.11			-3.2			-3.36			-3.26			-3.2			-3.25
		IP	23.78	23.96		24.64	24.81		25.45	25.45		26.88	27.06		27.62	27.69			IP	22.46	22.41		22.46	22.34		22.73	22.73		23.05	23		24.06	24.11		25.45	25.2
		TBP ChIP (%)	0.122			0.078			0.05			0.019			0.015				TBP ChIP (%)	2.676			2.36			2.016			1.408			0.62			0.284
		TBP (T0=100)	100			64.3			40.7			15.6			11.9				TBP (T0=100)	100			88.2			75.3			52.6			23.2			10.6
	RPL2B PRO	time point	T0			T5			T10			T30			T60			tI(AAU)N1 PRO	time point	T0			T2			T5			T10			T30			T60
			PCR1	PCR2		PCR1	PCR2		PCR1	PCR2		PCR1	PCR2		PCR1	PCR2				PCR1	PCR2		PCR1	PCR2		PCR1	PCR2		PCR1	PCR2		PCR1	PCR2		PCR1	PCR2
		input 0.40%	22.08	22.2		22.13	22.27		22.08	22.09		22.26	22.23		22.47	22.46			input 4.00%	22.97	22.87		22.65	22.56		22.57	22.42		22.33	22.29		22.26	22.24		22.19	22.13
		input 0.004%	29.08	29.18		28.91	29.17		29.34	29.31		29.28	29.77		29.3	29.93			input 0.04%	29.06	29.25		29.22	29.3		29.58	29.07		29.01	28.87		28.71	28.93		29.12	28.93
		slope	-3.49			-3.42			-3.62			-3.64			-3.6				slope	-3.12			-3.33			-3.41			-3.32			-3.3			-3.43
		IP	23.13	23.34		23.92	24.05		24.7	24.75		26.25	26.22		27.31	27.2			IP	23.87	23.91		23.76	23.75		24.47	24.45		24.94	24.84		26.23	26.29		27.68	27.54
		TBP ChIP (%)	0.186			0.119			0.072			0.03			0.017				TBP ChIP (%)	1.952			1.808			1.06			0.668			0.241			0.103
		TBP (T0=100)	100			64.1			38.7			16.2			9.2				TBP (T0=100)	100			92.6			54.3			34.2			12.3			5.3
	RPS5 PRO	time point	T0			T5			T10			T30			T60			tA(AGC)M2 PRO	time point	T0			T2			T5			T10			T30			T60
			PCR1	PCR2		PCR1	PCR2		PCR1	PCR2		PCR1	PCR2		PCR1	PCR2				PCR1	PCR2		PCR1	PCR2		PCR1	PCR2		PCR1	PCR2		PCR1	PCR2		PCR1	PCR2
		input 4.00%	22.23	22.21		22.27	22.29		22.27	22.22		22.35	22.45		22.65	22.57			input 4.00%	22.57	22.42		22.43	22.32		22.37	22.28		22.1	22.08		22.03	21.92		22.09	21.89
		input 0.04%	29.05	29.05		29.37	29.34		29.17	29.38		29.19	29.45		29.52	29.21			input 0.04%	29.05	28.9		28.93	29.08		29.01	29.05		28.73	28.32		28.44	28.42		28.36	28.09
		slope	-3.31			-3.54			-3.52			-3.46			-3.38				slope	-3.24			-3.32			-3.35			-3.22			-3.23			-3.12
		IP	26.38	26.62		27.16	27.39		28.24	28.13		29.02	29.34		29.84	29.84			IP	23.3	23.19		23.16	23.22		23.58	23.51		23.89	23.81		25.18	25.21		26.12	26.01
		TBP ChIP (%)	0.225			0.156			0.082			0.044			0.029				TBP ChIP (%)	2.344			2.26			1.732			1.132			0.404			0.197
		TBP (T0=100)	100			69.2			36.3			19.6			12.9				TBP (T0=100)	100			96.4			73.9			48.3			17.2			8.4
